# Supplementary material for: The Antifungal Mechanism of Isoxanthohumol from Humulus lupulus Linn
Source: MDPI journal article supplement (doi:10.3390/ijms221910853), 2021-10-07
Supplement: s1 [file s1]

**Supplemental Table S1.** Inhibition of mycelium of three plant pathogenic fungi by isoxanthohumol.

| Compound       | Concentration<br>( $\mu\text{g/mL}$ ) | Inhibition rate <sup>a</sup> (%) $\pm$ SD |                         |                             |
|----------------|---------------------------------------|-------------------------------------------|-------------------------|-----------------------------|
|                |                                       | <i>Sclerotinia sclerotiorum</i>           | <i>Botrytis cinerea</i> | <i>Fusarium graminearum</i> |
| Isoxanthohumol | 50                                    | 84.46 $\pm$ 0.30                          | 85.90 $\pm$ 0.24        | 63.88 $\pm$ 0.23            |
|                | 25                                    | 79.49 $\pm$ 0.05                          | 78.45 $\pm$ 0.32        | 60.43 $\pm$ 0.82            |
|                | 10                                    | 33.28 $\pm$ 0.64                          | 61.03 $\pm$ 0.43        | 45.11 $\pm$ 0.23            |
|                | 5                                     | 11.15 $\pm$ 1.82                          | 57.00 $\pm$ 0.60        | 27.08 $\pm$ 1.24            |
|                | 2.5                                   | 5.73 $\pm$ 0.14                           | 39.03 $\pm$ 0.93        | 0.00 $\pm$ 0.00             |
|                | EC <sub>50</sub>                      | <b>14.52</b>                              | <b>4.32</b>             | <b>16.50</b>                |

<sup>a</sup> Repeat each treatment three times. Data are displayed as mean  $\pm$  SD.

**Supplemental Table S2.** Key DEGs involved in Carbon metabolism and TCA cycle and their primer sequences.

| Gene alias    | Control<br>FPKM | Treat_FPKM | log2 Fold Change | Annotation                | Primer sequences                                                                                                                                                                                                                                                                                                                                    |
|---------------|-----------------|------------|------------------|---------------------------|-----------------------------------------------------------------------------------------------------------------------------------------------------------------------------------------------------------------------------------------------------------------------------------------------------------------------------------------------------|
| BCIN_07g05430 | 0.273           | 37.186     | 6.58             | Carbon metabolism         | F:CGAGAAGGTGCTGAGTTAGA<br>TG<br>R:CCTTTCAGGTTTCAGGGAAGA<br>TT<br>F:CTGTATCCACCCAAGCCTATA<br>C<br>R:TTTCTCTCGTCGTAGCATTCC<br>F:CAATCACTGACGAACCCTCT<br>AA<br>R:AACCAGTCTCCATGCTCTTTC<br>F:ATGCCACCAAGACCATCAC<br>R:CATCTCCGTCGCGTCAATAA<br>F:CTCGTCTGTATGGCCGTATT<br>R:CAAACCGACGAAGCACATTA<br>C<br>F:GGATTTGGCGAGAACAAGGA<br>R:GTGAGTGGTGTGAGCAGAAA |
| BCIN_15g02910 | 0.790           | 4.343      | 2.46             | Carbon metabolism         |                                                                                                                                                                                                                                                                                                                                                     |
| Bcboa1        | 1.436           | 5.503      | 1.94             | Carbon metabolism         |                                                                                                                                                                                                                                                                                                                                                     |
| Bcpio2        | 0.393           | 1.596      | 1.81             | Carbon metabolism         |                                                                                                                                                                                                                                                                                                                                                     |
| BCIN_12g00360 | 137.170         | 51.030     | -1.33            | Carbon metabolism         |                                                                                                                                                                                                                                                                                                                                                     |
| BCIN_02g02750 | 316.836         | 529.293    | 0.82             | Citrate cycle (TCA cycle) |                                                                                                                                                                                                                                                                                                                                                     |

|               |         |         |      |                              |                                                        |
|---------------|---------|---------|------|------------------------------|--------------------------------------------------------|
| BCIN_05g04430 | 176.703 | 288.606 | 0.79 | Citrate cycle (TCA<br>cycle) | F:TTGAATCCAGCTACCGATGC<br>R:GCACTCTCTTCGATGGGAAA<br>TA |
|---------------|---------|---------|------|------------------------------|--------------------------------------------------------|
